# Supplementary material for: Does repeat synthesis in materials chemistry obey a power law?
Source: PubMed Central journal article supplement — Proc Natl Acad Sci U S A. 2019 Dec 26;117(2):877–82. doi: 10.1073/pnas.1918484117 (PMC6969490; doi:10.1073/pnas.1918484117), 2019-12-26
Supplement: pnas.1918484117.sapp.pdf [file pnas.1918484117.sapp.pdf]

# PNAS

[www.pnas.org](http://www.pnas.org)

Supplementary Information for

**Does Repeat Synthesis in Materials Chemistry Obey a Power Law?**

*Mayank Agrawal<sup>‡</sup>, Rebecca Han<sup>‡</sup>, Dinushka Herath and David S. Sholl\**

*School of Chemical & Biomolecular Engineering  
Georgia Institute of Technology  
Atlanta, GA 30332-0100, USA*

*David S. Sholl*

Email: [david.sholl@chbe.gatech.edu](mailto:david.sholl@chbe.gatech.edu)

**This PDF file includes:**

Figures S1 to S4  
Tables S1 to S7  
SI References

**Table S1:** Year of publication, reference code, number of citations, number of exact syntheses by the same and new authors, and number of modified syntheses by same and new authors, of all 130 materials selected from the CoRE MOF database.

| Year | CSD Code     | Citations | Exact,<br>new<br>authors | Exact,<br>same<br>authors | Modified,<br>new<br>authors | Modified,<br>same<br>authors |
|------|--------------|-----------|--------------------------|---------------------------|-----------------------------|------------------------------|
| 2007 | CETGOY(1)    | 49        | 0                        | 0                         | 0                           | 0                            |
| 2007 | DIXHIC(2)    | 15        | 0                        | 0                         | 0                           | 0                            |
| 2007 | GIQZIQ(3)    | 21        | 0                        | 0                         | 1                           | 1                            |
| 2007 | HEXNII(4)    | 20        | 0                        | 0                         | 1                           | 2                            |
| 2007 | HOMZEP(5)    | 54        | 0                        | 0                         | 0                           | 4                            |
| 2007 | IJOMOJ06(6)  | 77        | 0                        | 0                         | 7                           | 10                           |
| 2007 | KIFJIT(7)    | 32        | 0                        | 0                         | 0                           | 0                            |
| 2007 | PIKBUH(8)    | 27        | 0                        | 0                         | 0                           | 0                            |
| 2007 | RIPTAM(9)    | 26        | 0                        | 0                         | 0                           | 0                            |
| 2007 | SINXET(10)   | 19        | 0                        | 0                         | 0                           | 0                            |
| 2007 | TICPOL(11)   | 19        | 0                        | 0                         | 0                           | 1                            |
| 2007 | TIRLIQ(12)   | 17        | 0                        | 0                         | 0                           | 0                            |
| 2007 | TISGUY(13)   | 48        | 0                        | 0                         | 1                           | 0                            |
| 2007 | TIVYAZ01(14) | 41        | 0                        | 0                         | 1                           | 1                            |
| 2007 | XUBJAF02(15) | 8         | 1                        | 0                         | 0                           | 0                            |
| 2008 | AFOYOK(16)   | 53        | 0                        | 0                         | 4                           | 2                            |
| 2008 | COMFAM(17)   | 32        | 0                        | 0                         | 0                           | 1                            |
| 2008 | GOGSIF(18)   | 13        | 0                        | 0                         | 4                           | 1                            |
| 2008 | KOLWEO(19)   | 52        | 0                        | 0                         | 0                           | 0                            |
| 2008 | KONCIA(20)   | 44        | 0                        | 0                         | 0                           | 1                            |
| 2008 | LOPZAS(21)   | 24        | 0                        | 0                         | 0                           | 0                            |
| 2008 | MOGNAY(22)   | 14        | 0                        | 0                         | 0                           | 1                            |
| 2008 | NOHFOG(23)   | 31        | 0                        | 0                         | 2                           | 1                            |
| 2008 | RIWSUM(24)   | 27        | 0                        | 0                         | 0                           | 0                            |
| 2008 | SODZIV(25)   | 19        | 0                        | 0                         | 0                           | 0                            |
| 2008 | TOKDON(26)   | 44        | 0                        | 0                         | 0                           | 1                            |
| 2008 | UFOFIF(27)   | 22        | 1                        | 0                         | 0                           | 1                            |
| 2008 | WOCJII(28)   | 21        | 0                        | 0                         | 4                           | 0                            |
| 2008 | XOJWEZ(29)   | 47        | 0                        | 0                         | 0                           | 0                            |
| 2008 | YOMBAE(30)   | 15        | 0                        | 0                         | 0                           | 1                            |
| 2009 | COXFOL(31)   | 29        | 0                        | 0                         | 0                           | 1                            |
| 2009 | CUGVUW(32)   | 22        | 0                        | 0                         | 0                           | 1                            |
| 2009 | GIYSAJ02(33) | 47        | 0                        | 0                         | 0                           | 1                            |
| 2009 | GUKZAO(34)   | 37        | 0                        | 0                         | 0                           | 0                            |
| 2009 | LUKLIN(35)   | 55        | 0                        | 0                         | 0                           | 5                            |
| 2009 | MUNPAN(36)   | 28        | 0                        | 0                         | 0                           | 0                            |
| 2009 | OHAZAZ(37)   | 44        | 0                        | 0                         | 0                           | 5                            |
| 2009 | OHOLIH(38)   | 15        | 0                        | 0                         | 0                           | 0                            |
| 2009 | QUFFED(39)   | 53        | 0                        | 0                         | 1                           | 3                            |
| 2009 | QUTYOU(40)   | 42        | 0                        | 0                         | 1                           | 0                            |

|      |              |     |   |   |   |   |
|------|--------------|-----|---|---|---|---|
| 2009 | RUCGOM(41)   | 17  | 0 | 0 | 7 | 0 |
| 2009 | UHSOU(42)    | 49  | 2 | 0 | 1 | 1 |
| 2009 | VACFUB01(43) | 16  | 0 | 0 | 0 | 4 |
| 2010 | CESYEF01(44) | 17  | 0 | 0 | 0 | 1 |
| 2010 | CURBOH(45)   | 25  | 0 | 0 | 0 | 1 |
| 2010 | DUQSEO(46)   | 54  | 0 | 0 | 0 | 3 |
| 2010 | EKARUE(47)   | 15  | 0 | 0 | 0 | 0 |
| 2010 | GURZID(48)   | 12  | 0 | 0 | 0 | 1 |
| 2010 | ILITUT(49)   | 46  | 0 | 0 | 0 | 1 |
| 2010 | LUPYAX(50)   | 52  | 0 | 0 | 0 | 0 |
| 2010 | MACHIJ(51)   | 27  | 0 | 1 | 0 | 0 |
| 2010 | MUTVUT(52)   | 40  | 0 | 0 | 0 | 0 |
| 2010 | MUVJIX(53)   | 104 | 1 | 0 | 3 | 8 |
| 2010 | NUZCER(54)   | 43  | 0 | 0 | 0 | 0 |
| 2010 | OSOYUR(55)   | 46  | 0 | 0 | 0 | 1 |
| 2010 | OWIZAW(56)   | 30  | 0 | 0 | 0 | 0 |
| 2010 | QUQGAL(57)   | 46  | 0 | 1 | 1 | 1 |
| 2010 | QUQGEP(58)   | 27  | 0 | 0 | 1 | 0 |
| 2010 | RUSSAA(59)   | 13  | 0 | 0 | 0 | 2 |
| 2010 | RUTBUE(60)   | 16  | 0 | 0 | 4 | 0 |
| 2010 | RUVKOJ(61)   | 14  | 0 | 0 | 1 | 0 |
| 2010 | UKUBUY(62)   | 33  | 0 | 0 | 0 | 1 |
| 2010 | VAGKOF(63)   | 47  | 0 | 0 | 1 | 0 |
| 2010 | XUNGUJ(64)   | 86  | 1 | 0 | 2 | 5 |
| 2010 | XUYXAR(65)   | 32  | 0 | 0 | 1 | 4 |
| 2011 | ANEPIT(66)   | 51  | 0 | 0 | 1 | 0 |
| 2011 | AXUBOL(67)   | 43  | 0 | 0 | 1 | 5 |
| 2011 | EBUREA(68)   | 26  | 0 | 0 | 0 | 0 |
| 2011 | EMITUQ(69)   | 26  | 0 | 0 | 0 | 0 |
| 2011 | EPOXAJ(70)   | 46  | 0 | 0 | 1 | 2 |
| 2011 | EZOEX(71)    | 23  | 0 | 0 | 0 | 0 |
| 2011 | HAWREE(72)   | 55  | 0 | 1 | 0 | 2 |
| 2011 | IBUYAH(73)   | 22  | 0 | 0 | 1 | 1 |
| 2011 | IJEXUR(74)   | 31  | 0 | 0 | 0 | 0 |
| 2011 | IYICUP(75)   | 20  | 0 | 0 | 2 | 0 |
| 2011 | IZUMUM(76)   | 35  | 2 | 0 | 2 | 4 |
| 2011 | NALYEG(77)   | 28  | 0 | 0 | 1 | 0 |
| 2011 | OCIZIL(78)   | 53  | 0 | 0 | 0 | 2 |
| 2011 | OVEXOD(79)   | 42  | 0 | 0 | 0 | 1 |
| 2011 | OVIWIA(80)   | 48  | 0 | 0 | 2 | 1 |
| 2011 | OXUPUT(81)   | 26  | 0 | 0 | 4 | 0 |
| 2011 | OYUJUO(82)   | 22  | 0 | 0 | 0 | 0 |
| 2011 | PAMHIW(83)   | 14  | 0 | 0 | 0 | 2 |
| 2011 | RAHNOF(84)   | 54  | 0 | 0 | 1 | 1 |
| 2011 | REGYOT(85)   | 50  | 0 | 0 | 1 | 2 |
| 2011 | UBOGAV(86)   | 46  | 0 | 0 | 6 | 2 |

|      |             |     |   |   |   |   |
|------|-------------|-----|---|---|---|---|
| 2011 | UVEVUN(87)  | 59  | 0 | 0 | 0 | 0 |
| 2011 | UVINAP(88)  | 45  | 0 | 0 | 0 | 1 |
| 2011 | UXUYUI(89)  | 54  | 0 | 0 | 1 | 3 |
| 2011 | UZIJUJ(90)  | 14  | 0 | 0 | 0 | 0 |
| 2012 | ADODAA(91)  | 45  | 0 | 0 | 0 | 6 |
| 2012 | BAXSIE(92)  | 51  | 0 | 0 | 2 | 0 |
| 2012 | FAJYAS(93)  | 13  | 0 | 0 | 1 | 2 |
| 2012 | FAQVEA(94)  | 34  | 0 | 0 | 1 | 0 |
| 2012 | FATLUJ(95)  | 57  | 0 | 0 | 0 | 0 |
| 2012 | GEDLIM(96)  | 18  | 1 | 0 | 3 | 0 |
| 2012 | HARNAR(97)  | 18  | 0 | 0 | 0 | 0 |
| 2012 | HEBJAB(98)  | 55  | 0 | 0 | 0 | 3 |
| 2012 | HEBKEG(99)  | 28  | 0 | 0 | 1 | 1 |
| 2012 | HEKTAU(100) | 45  | 0 | 0 | 0 | 3 |
| 2012 | KEQJEX(101) | 46  | 0 | 1 | 0 | 2 |
| 2012 | LASMAV(102) | 22  | 0 | 0 | 0 | 0 |
| 2012 | LECGIL(103) | 29  | 0 | 0 | 0 | 0 |
| 2012 | MEFHUC(104) | 27  | 0 | 0 | 0 | 3 |
| 2012 | NAYXOC(105) | 29  | 2 | 0 | 1 | 2 |
| 2012 | NEFTOJ(106) | 11  | 0 | 0 | 0 | 3 |
| 2012 | PEMRIK(107) | 64  | 0 | 0 | 0 | 0 |
| 2012 | QEGNOH(108) | 33  | 0 | 1 | 0 | 0 |
| 2012 | SAKNOJ(109) | 31  | 0 | 0 | 0 | 0 |
| 2012 | SAPBIW(110) | 168 | 5 | 2 | 4 | 5 |
| 2012 | SESKUY(111) | 22  | 0 | 0 | 0 | 2 |
| 2012 | VEPDEB(112) | 15  | 0 | 0 | 0 | 0 |
| 2012 | WIFGOJ(113) | 47  | 0 | 0 | 0 | 0 |
| 2012 | ZEDZAL(114) | 30  | 0 | 2 | 0 | 5 |
| 2013 | BETZOR(115) | 18  | 0 | 0 | 0 | 0 |
| 2013 | DEYLUQ(116) | 29  | 0 | 0 | 0 | 0 |
| 2013 | DEYNIG(117) | 23  | 0 | 0 | 0 | 0 |
| 2013 | FEZREJ(118) | 15  | 0 | 0 | 0 | 0 |
| 2013 | GINDEO(119) | 20  | 0 | 0 | 2 | 0 |
| 2013 | LELMEW(120) | 16  | 0 | 0 | 0 | 0 |
| 2013 | NIMWUD(121) | 22  | 0 | 0 | 3 | 0 |
| 2013 | PETWOC(122) | 63  | 0 | 0 | 2 | 3 |
| 2013 | QEWDON(123) | 23  | 0 | 0 | 1 | 0 |
| 2013 | RIDGIW(124) | 37  | 0 | 0 | 0 | 0 |
| 2013 | SEQTEP(125) | 28  | 0 | 0 | 1 | 2 |
| 2013 | SETDUS(126) | 18  | 0 | 0 | 0 | 0 |
| 2013 | SEVLEM(127) | 25  | 0 | 0 | 1 | 1 |
| 2013 | VICYUD(128) | 20  | 0 | 0 | 0 | 2 |
| 2013 | VIDPIJ(129) | 20  | 0 | 0 | 0 | 0 |
| 2013 | ZETMOC(130) | 50  | 0 | 0 | 1 | 2 |

**Table S2:** Breakdown from 2007 to 2013 of the number of original papers, total number of citations, and average citations per paper for the 130 MOFs investigated (citation analysis was done in January 2019).

| Original Publication Year | Number of Original Papers | Total Number of Citations | Avg Citations per Paper per Year |
|---------------------------|---------------------------|---------------------------|----------------------------------|
| 2007                      | 15                        | 473                       | 32                               |
| 2008                      | 15                        | 458                       | 31                               |
| 2009                      | 13                        | 454                       | 35                               |
| 2010                      | 22                        | 825                       | 38                               |
| 2011                      | 25                        | 933                       | 37                               |
| 2012                      | 24                        | 938                       | 39                               |
| 2013                      | 16                        | 427                       | 27                               |

**Table S3:** Observations of repeat syntheses of 130 MOFs originally reported from 2007-2013.

| n  | Repeat synthesis by any group                                                                                                                | Repeat synthesis by original research group                          | Repeat synthesis by different group(s)                               |
|----|----------------------------------------------------------------------------------------------------------------------------------------------|----------------------------------------------------------------------|----------------------------------------------------------------------|
| 4+ | SAPBIW (n = 7)(110)                                                                                                                          | SAPBIW (n = 5)(110)                                                  |                                                                      |
| 3  | UHSOU(42)<br>IZUMUM(76)<br>NAYXOC(105)<br>ZEDZAL(114)                                                                                        | UHSOU(42)<br>IZUMUM(76)<br>NAYXOC(105)                               | SAPBIW(110)<br>ZEDZAL(114)                                           |
| 2  | MACHIJ(51)<br>QUQGAL(57)<br>HAWREE(72)<br>KEQJEX(101)<br>QEGNOH(108)<br>XUBJAF02(15)<br>UFOFIF(27)<br>MUVJIX(53)<br>XUNGUJ(64)<br>GEDLIM(96) | XUBJAF02(15)<br>UFOFIF(27)<br>MUVJIX(53)<br>XUNGUJ(64)<br>GEDLIM(96) | MACHIJ(51)<br>QUQGAL(57)<br>HAWREE(72)<br>KEQJEX(101)<br>QEGNOH(108) |
| 1  | 115 MOFs from set in Table S1                                                                                                                | 121 MOFs from set in Table S1                                        | 123 MOFs from set in Table S1                                        |

**Table S4:** Power-law models for exact repeat syntheses of 130 MOFs.

| n | # of MOFs exactly synthesized by any | # of MOFs exactly synthesized by | # of MOFs exactly synthesized by |
|---|--------------------------------------|----------------------------------|----------------------------------|
|---|--------------------------------------|----------------------------------|----------------------------------|

|    | <b>group</b>                              | <b>original research group</b>            | <b>different groups</b>                   |
|----|-------------------------------------------|-------------------------------------------|-------------------------------------------|
| 1  | 115                                       | 121                                       | 123                                       |
| 2  | 10                                        | 5                                         | 5                                         |
| 3  | 4                                         | 3                                         | 2                                         |
| 4+ | 1 (n=7)                                   | 1 (n=5)                                   | 0                                         |
|    | <b><i>f</i> = 0.8846, <i>α</i> = 3.46</b> | <b><i>f</i> = 0.9308, <i>α</i> = 4.11</b> | <b><i>f</i> = 0.9461, <i>α</i> = 4.45</b> |

**Table S5:** Modified syntheses of 130 MOFs.

| <b>n</b> | <b># of MOFs modified synthesized by any group</b> | <b># of MOFs modified synthesized by original research group</b> | <b># of MOFs modified synthesized by different groups</b> |
|----------|----------------------------------------------------|------------------------------------------------------------------|-----------------------------------------------------------|
| 1        | 46                                                 | 64                                                               | 82                                                        |
| 2        | 27                                                 | 29                                                               | 28                                                        |
| 3        | 18                                                 | 16                                                               | 8                                                         |
| 4+       | 39                                                 | 21                                                               | 12                                                        |

**Table S6:** Most studied MOFs, their frequency in NIST database and the number of citations received by their original literature report.

| S.No. | MOF                   | DOI (original paper)          | Citations | Frequency in NIST database |
|-------|-----------------------|-------------------------------|-----------|----------------------------|
| 1     | IRMOF-1 / MOF-5       | 10.1038/46248                 | 5502      | 314                        |
| 2     | CuBTC / HKUST-1       | 10.1126/science.283.5405.1148 | 4401      | 334                        |
| 3     | MIL-101               | 10.1126/science.1116275       | 3286      | 85                         |
| 4     | ZIF-8                 | 10.1073/pnas.0602439103       | 3275      | 157                        |
| 5     | ZIF-7                 | 10.1073/pnas.0602439103       | 3275      | 43                         |
| 6     | ZIF-4                 | 10.1073/pnas.0602439103       | 3273      | 2                          |
| 7     | MOF-177               | 10.1038/nature02311           | 2516      | 60                         |
| 8     | UiO-66                | 10.1021/ja8057953             | 2420      | 53                         |
| 9     | Zn-MOF-74             | 10.1021/ja045123o             | 1798      | 26                         |
| 10    | COF-102               | 10.1126/science.1139915       | 1376      | 23                         |
| 11    | MIL-53(Cr)            | 10.1021/ja0276974             | 1316      | 44                         |
| 12    | MCM-41                | 10.1016/0927-6513(93)80058-3  | 1200      | 20                         |
| 13    | NU-100x               | 10.1038/nchem.834             | 1124      | 3                          |
| 14    | [Zn(bdc)(ted)0.5]     | 10.1002/anie.200460712        | 1033      | 8                          |
| 15    | MIL-47                | 10.1002/1521-3773             | 861       | 30                         |
| 16    | PCN-14                | 10.1021/ja0771639             | 756       | 15                         |
| 17    | MIL-100(Cr)           | 10.1002/ange.200460592        | 611       | 15                         |
| 18    | MIL-100(Fe)           | 10.1039/B704325B              | 524       | 25                         |
| 19    | UMCM-1                | 10.1002/anie.200705020        | 426       | 16                         |
| 20    | MOF-74-Ni             | 10.1039/B515434K              | 372       | 24                         |
| 21    | Mg-MOF-74 / CPO-27-Mg | 10.1002/ejic.200701284        | 200       | 51                         |
| 22    | NU-1000               | 10.1021/ja4050828             | 390       | 3                          |
| 23    | MOF-808               | 10.1021/ja500330a             | 710       | 1                          |
| 24    | MIL-125-NH2           | 10.1021/ja903726m             | 510       | 1                          |

**Table S7:** Citation details of six MOFs selected as described in the main text, counts of replicate syntheses and linker costs. Linker costs were obtained from commercial suppliers (e.g. SigmaAldrich).

| <b>MOF</b>       | <b>Total citations of the original paper<sup>a</sup></b> | <b>Exact repeated syntheses in 500 randomly selected citations</b> | <b>Total approximated exact syntheses of the MOF</b> | <b>Linker</b> | <b>Commercial Cost</b> | <b>Institute of original synthesis</b>   |
|------------------|----------------------------------------------------------|--------------------------------------------------------------------|------------------------------------------------------|---------------|------------------------|------------------------------------------|
| UiO-66(131)      | 2535                                                     | 147                                                                | 745                                                  | BDC           | \$0.3/g                | University of Oslo, Norway               |
| ZIF-8(132)       | 3356                                                     | 115                                                                | 772                                                  | Imidazole     | \$0.25/g               | University of California Los Angeles     |
| Cu-BTC(133)      | 4536                                                     | 110                                                                | 998                                                  | BTC           | \$1.2/g                | Hong Kong University of Science and Tech |
| MIL-101(Cr)(134) | 3355                                                     | 118                                                                | 792                                                  | BDC           | \$0.3/g                | Institut Lavoisier, CNRS                 |
| IRMOF-1(135)     | 5661                                                     | 26                                                                 | 295                                                  | BDC           | \$0.3/g                | University of Michigan                   |
| MOF-177(136)     | 2552                                                     | 12                                                                 | 61                                                   | H3BTB         | \$267/g                | University of Michigan                   |

<sup>a</sup>Citation analysis was done in January 2019.



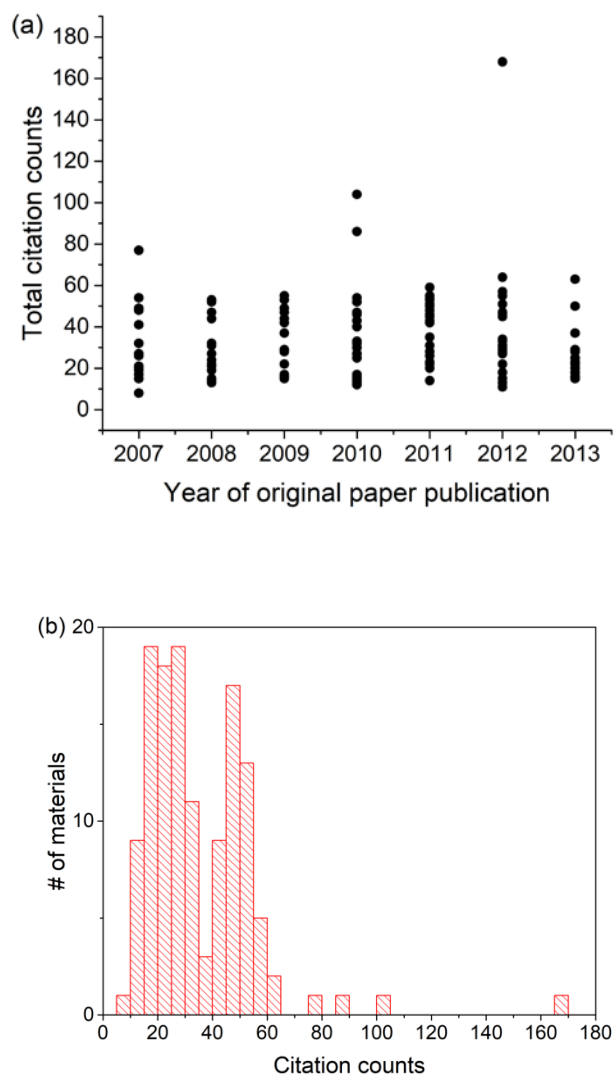

**Figure S1:** Citation analysis of all papers performed on Jan 15<sup>th</sup> 2019 (a) total citations of each paper with the year of publication, (b) histogram of citation counts of all original papers corresponding to synthesis of 130 MOFs from CoRE MOF database.

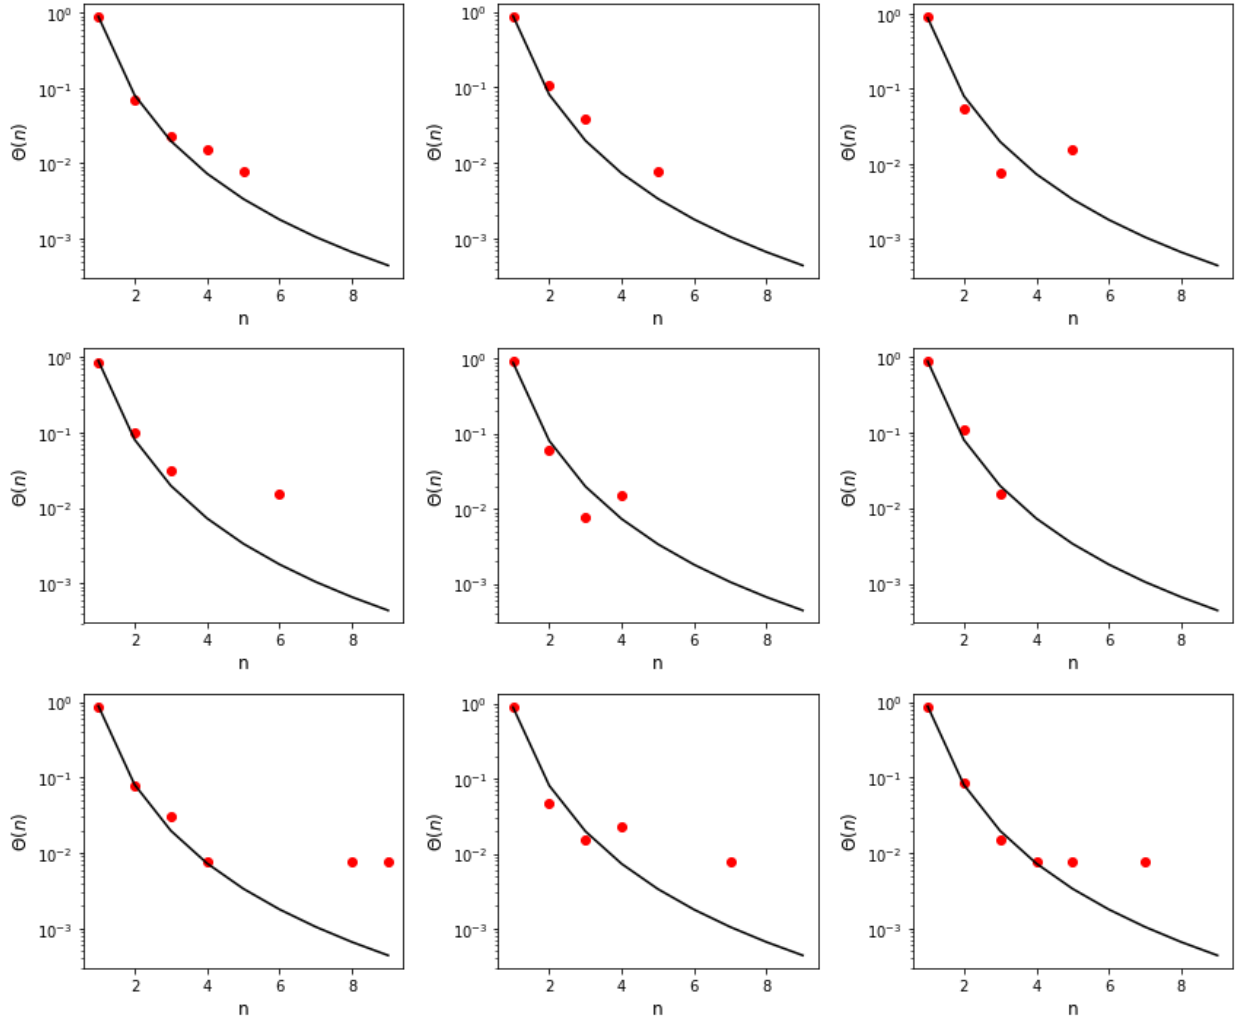

**Figure S2:** An ensemble of 9 examples of synthetic data generated using the fitted power law. The black line shows the power law from which these datasets are generated.

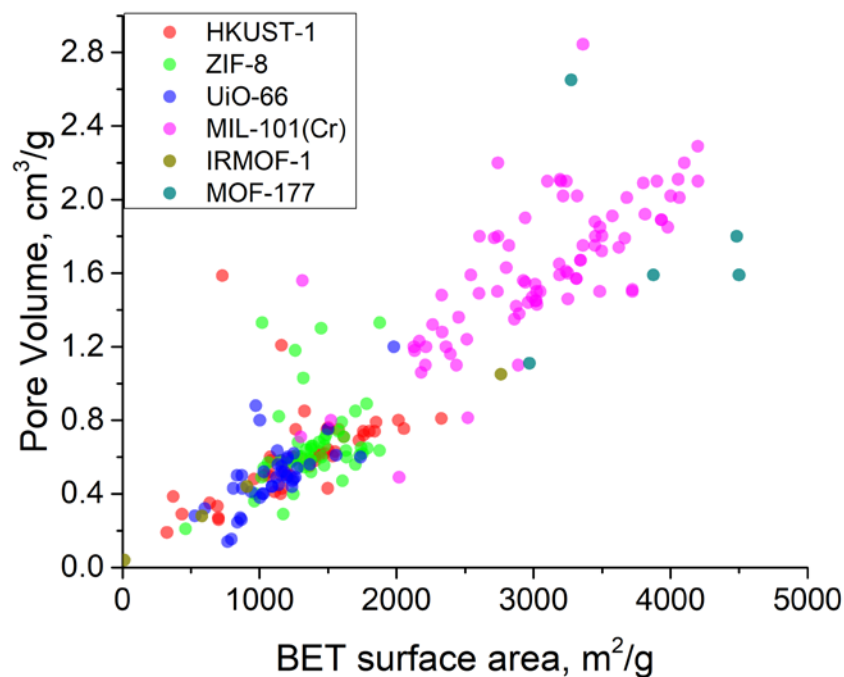

**Figure S3:** Correlation between pore volume and BET surface area of syntheses reported in literature for the six MOFs highlighted in Table S6.

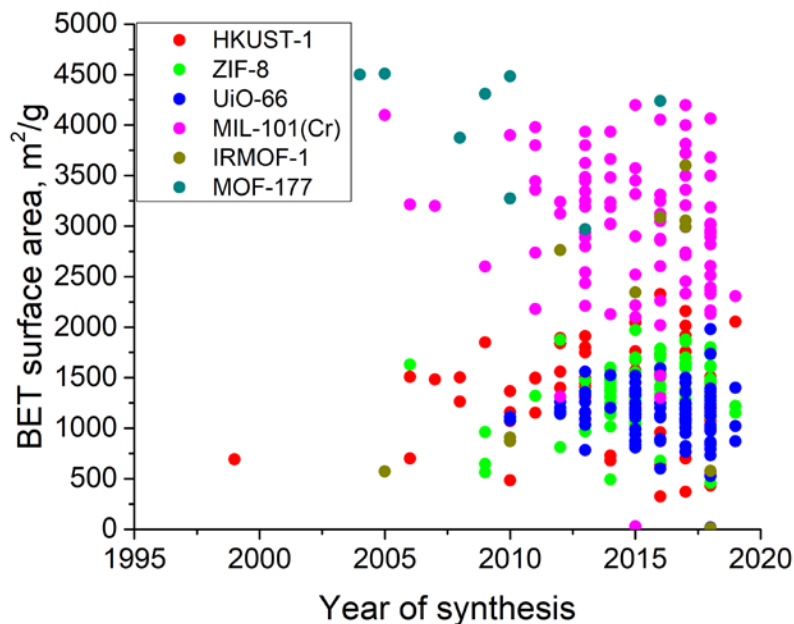

**Figure S4:** Variation in reported BET surface area of resynthesized MOFs with the year of synthesis.

**References**

1. Z. F. Chen, S. F. Zhang, H. S. Luo, B. F. Abrahams, H. Liang,

- $\text{Ni}_2(\text{R}^*\text{COO})_4(\text{H}_2\text{O})(4,4'\text{-bipy})_2$  - A robust homochiral quartz-like network with large chiral channels. *CrystEngComm* **9**, 27–29 (2007).
- W. M. Chang, M. Y. Cheng, Y. C. Liao, M. C. Chang, S. L. Wang, Template effect of chain-type polyamines on pore augmentation: Five open-framework zinc phosphates with 16-ring channels. *Chem. Mater.* **20**, 1660 (2008).
  - I. Senkowska, J. Fritsch, S. Kaskel, New polymorphs of magnesium-based metal-organic frameworks  $\text{Mg}_3(\text{ndc})_3$  (ndc = 2,6-naphthalenedicarboxylate). *Eur. J. Inorg. Chem.* **3**, 5475–5479 (2007).
  - D. B. Cordes, L. R. Hanton, M. D. Spicer, Six-Coordinated Cd(II) centers as four- or six-connected nodes in coordination polymer networks containing bis(4-pyridyl)amine. *Cryst. Growth Des.* **7**, 328–336 (2007).
  - C. Volkringer, *et al.*, Synthesis, crystal structure and  $^{71}\text{Ga}$  solid state NMR of a MOF-type gallium trimesate (MIL-96) with  $\mu_3$ -oxo bridged trinuclear units and a hexagonal 18-ring network. *Microporous Mesoporous Mater.* **105**, 111–117 (2007).
  - B. Zhang, *et al.*, Guest-induced chirality in the ferrimagnetic nanoporous diamond framework  $\text{Mn}_3(\text{HCOO})_6$ . *Adv. Funct. Mater.* **17**, 577–584 (2007).
  - A. D. Burrows, K. Cassar, M. F. Mahon, J. E. Warren, The stepwise formation of mixed-metal coordination networks using complexes of 3-cyanoacetylacetonate. *Dalt. Trans.* **4**, 2499–2509 (2006).
  - G. Smith, U. D. Wermuth, D. J. Young, J. M. White, Polymeric structures in the metal complexes of 5-sulfosalicylic acid: The rubidium(I), caesium(I) and lead(II) analogues. *Polyhedron* **26**, 3645–3652 (2007).
  - M. Li, L. Yuan, H. Li, J. Sun, A 3D heterometallic metal-organic framework constructed from luminescent building blocks, exhibiting reversible dehydration and rehydration procedure. *Inorg. Chem. Commun.* **10**, 1281–1284 (2007).
  - H. Y. Zhang, H. J. Yu, H. X. Xu, J. S. Ren, X. G. Qu, Structural diversity of lanthanide-amino acid complexes under near physiological pH conditions and their recognition of single-stranded DNA. *Polyhedron* **26**, 5250–5256 (2007).
  - T. L. Schull, *et al.*, Organometallic supramolecular mixed-valence cobalt(I)/cobalt(II) aquo complexes stabilized with the water-soluble phosphine ligand p-TPPTP (p-triphenylphosphine triphosphonic acid). *Organometallics* **26**, 2272–2276 (2007).
  - B. S. Luisi, Z. Ma, B. Moulton, Tri-metal secondary building units: Toward the design of thermally robust crystalline coordination polymers. *J. Chem. Crystallogr.* **37**, 743–747 (2007).
  - S. Hu, *et al.*, A dynamic microporous metal-organic framework with BCT zeolite topology: Construction, structure, and adsorption behavior. *Cryst. Growth Des.* **7**, 2286–2289 (2007).
  - F. Luo, Y. X. Che, J. M. Zheng, A ternary metal - Organic framework built on triangular organic spacers, square and tetrahedral  $\text{Co}_2$  secondary building units. *Cryst. Growth Des.* **8**, 176–178 (2008).
  - C. Z. Zhang, H. Y. Mao, Y. L. Wang, H. Y. Zhang, J. C. Tao, Syntheses of two new hybrid metal-organic polymers using flexible aliphatic dicarboxylates and pyrazine: Crystal structures and magnetic studies. *J. Phys. Chem. Solids* **68**, 236–242 (2007).

16. O. A. Bondar, *et al.*, New microporous copper(II) coordination polymers based upon bifunctional 1,2,4-triazole/tetrazolate bridges. *CrystEngComm* **10**, 1216–1226 (2008).
17. L. Han, W. Zhao, Y. Zhou, X. Li, J. Pan, One-Pot Synthesis of Supramolecular Isomers with Two-Dimensional  $4^4$  Grid and Three-Dimensional  $6^4 \cdot 8^2$  NbO Frameworks: Solvothermal in Situ Ligand Formation and Conformational. *Cryst. Growth Des.* **8**, 3504–3505 (2008).
18. M. A. Kiskin, G. G. Aleksandrov, A. S. Bogomyakov, V. M. Novotortsev, I. L. Eremenko, Coordination polymers of cobalt(II) with pyrimidine and pyrazine: Syntheses, structures and magnetic properties. *Inorg. Chem. Commun.* **11**, 1015–1018 (2008).
19. R. Heck, J. Bacsá, J. E. Warren, M. J. Rosseinsky, D. Bradshaw, Triply interpenetrated (3,4)- and (3,5)-connected binodal metal-organic networks prepared from 1,3,5-benzenetrisbenzoate and 4,4'-bipyridyl. *CrystEngComm* **10**, 1687–1692 (2008).
20. X. J. Zhang, *et al.*, A series of novel In-succinate-oxalate coordination polymers: Synthesis, structure, thermal stability, and fluorescent properties. *Cryst. Growth Des.* **8**, 3680–3688 (2008).
21. Y. J. Liu, *et al.*, A noncentrosymmetric 3D coordination polymer of metalocalix[4]arene. *Inorg. Chem.* **47**, 11514–11518 (2008).
22. Y. X. Zhou, X. Q. Shen, C. X. Du, B. L. Wu, H. Y. Zhang, 1D, 2D and 3D coordination polymers of aromatic carboxylate  $Tb^{III}$ : Structure, thermolysis kinetics and fluorescence. *Eur. J. Inorg. Chem.* **3**, 4280–4289 (2008).
23. N. Kerbellec, C. Daignebonne, K. Bernot, O. Guillou, X. Le Guillou, New lanthanide based coordination polymers with high potential porosity. *J. Alloys Compd.* **451**, 377–383 (2008).
24. H. Y. Lee, J. Park, M. S. Lah, J. Hong, One-Dimensional Double Helical Structure and 4-Fold Type [2 + 2] Interpenetration of Diamondoid Networks with Helical Fashion. *Cryst. Growth Des.* **14**, 2–6 (2008).
25. Z. J. Lin, *et al.*, Pore-size tuning in double-pillared metal-organic frameworks containing cadmium clusters. *CrystEngComm* **13**, 3321–3324 (2011).
26. S. Zhu, *et al.*, Synthesis, structures and luminescence of three coordination polymers constructed from rigid 1,3,5-benzenetricarboxylic acid and flexible bis(imidazol-1-ylmethyl)-benzene. *J. Mol. Struct.* **892**, 420–426 (2008).
27. W. Kosaka, K. Hashimoto, S. I. Ohkoshi, Three-dimensional manganese octacyanoniobate-based pyroelectric ferrimagnet. *Bull. Chem. Soc. Jpn.* **81**, 992–994 (2008).
28. F. The, C. Duhayon, T. S. Venkatakrishnan, J. Sutter, Supramolecular Hybrid Architectures Including an Open Framework with Reversible Sorption Properties. *Cryst. Growth Des.* **2**, 2–9 (2008).
29. Y. M. Xie, *et al.*, New ferroelectric and nonlinear optical porous coordination polymer constructed from a rare  $(CuBr)_\infty$  castellated chain. *Cryst. Growth Des.* **8**, 3914–3916 (2008).
30. G. Li, C. Salim, H. Hinode, Hydrothermal syntheses and crystal structures of two hybrid materials constructed from polyoxometalate clusters and metal-dipyridine complexes. *Solid State Sci.* **10**, 121–128 (2008).

31. F. Luo, J. Zheng, G. J. Long, Unique Anionic Eight-Connected Net with  $3^6 4^{18} 5^{36}$  Topology Derived from a Rare  $\text{Co}_6(\mu_3\text{-OH})_2(\mu\text{-H}_2\text{O})(\text{CO}_2)_{12}$  Building Block. *Cryst. Growth Des.* **3**, 1271–1274 (2009).
32. D. Liu, M. Li, D. Li, Reversible solid-gas chemical equilibrium between a 0-periodic deformable molecular tecton and a 3-periodic coordination architecture. *Chem. Commun.*, 6943–6945 (2009).
33. F. Gándara, *et al.*, Three lanthanum MOF polymorphs: Insights into kinetically and thermodynamically controlled phases. *Inorg. Chem.* **48**, 4707–4713 (2009).
34. J. He, *et al.*, Building thiol and metal-thiolate functions into coordination nets: Clues from a simple molecule. *J. Solid State Chem.* **182**, 1821–1826 (2009).
35. X.-S. Wang, *et al.*, A large-surface-area boracite-network-topology porous MOF constructed from a conjugated ligand exhibiting a high hydrogen uptake capacity. *Inorg. Chem.* **48**, 7519–7521 (2009).
36. A. P. Nelson, *et al.*, Crystal to crystal guest exchange in a mixed ligand metal-organic framework. *Cryst. Growth Des.* **9**, 4588–4591 (2009).
37. Z. B. Han, *et al.*, Synthesis, crystal structure and magnetic properties of two 3-D gadolinium complexes. *CrystEngComm* **11**, 2629–2633 (2009).
38. J. Seo, H. Chun, Hysteretic gas sorption in a microporous metal-organic framework with nonintersecting 3d channels. *Eur. J. Inorg. Chem.*, 4946–4949 (2009).
39. J. Hunger, H. Krautscheid, J. Sieler, Hydrothermal synthesis and structure of coordination polymers by combination of bipyrazole and aromatic dicarboxylate ligands. *Cryst. Growth Des.* **9**, 4613–4625 (2009).
40. Q. Yue, Q. Sun, A. L. Cheng, E. Q. Gao, Metal-organic framework based on  $[\text{Zn}_4\text{O}(\text{COO})_6]$  clusters: Rare 3D kagomé topology and luminescence. *Cryst. Growth Des.* **10**, 44–47 (2010).
41. T. Konno, N. Yoshinari, M. Taguchi, A. Igashira-Kamiyama, Drastic change in dimensional structures of D-penicillaminato  $(\text{Au}^{\text{I}}_2\text{Pt}^{\text{II}}_2\text{Zn}^{\text{II}})_n$  coordination polymers by moderate change in solution pH. *Chem. Lett.* **38**, 526–527 (2009).
42. H. K. Liu, T. H. Tsao, Y. T. Zhang, C. H. Lin, Microwave synthesis and single-crystal-to-single-crystal transformation of magnesium coordination polymers exhibiting selective gas adsorption and luminescence properties. *CrystEngComm* **11**, 1462–1468 (2009).
43. Y. Wu, *et al.*, Microporous 3-D chiral metal-organic framework with a quartzlike topology based on an achiral building unit. *J. Coord. Chem.* **62**, 2665–2674 (2009).
44. I. Kalf, P. Mathieu, U. Englert, From crystal to crystal: A new polymorph of (4-carboxylatopyridine) silver(i) by topotactic dehydration of its monohydrate. *New J. Chem.* **34**, 2491–2495 (2010).
45. K. Ohara, Y. Inokuma, M. Fujita, The catalytic Z to E isomerization of stilbenes in a photosensitizing porous coordination network. *Angew. Chemie - Int. Ed.* **49**, 5507–5509 (2010).
46. A. Rodríguez-Diéguez, A. Salinas-Castillo, A. Sironi, J. M. Seco, E. Colacio, A chiral diamondoid 3D lanthanum metal-organic framework displaying blue-greenish long lifetime photoluminescence emission. *CrystEngComm* **12**, 1876–1879 (2010).

47. N. Zhang, M. X. Li, Z. X. Wang, M. Shao, S. R. Zhu, Synthesis, structures and thermal stabilities of five copper(II) coordination polymers based on 2,4,6-tris(pyridyl)-1,3,5-triazine and 1,2,4,5-benzenetetracarboxylate ligands. *Inorganica Chim. Acta* **363**, 8–14 (2010).
48. B. Dey, *et al.*, Three dimensional metal-malonate frameworks with pillared layered architecture: Unusual role of metal-chelate as pillar. *Inorganica Chim. Acta* **363**, 981–987 (2010).
49. P. M. Barron, C. A. Wray, C. Hu, Z. Guo, W. Choe, A bioinspired synthetic approach for building metal-organic frameworks with accessible metal centers. *Inorg. Chem.* **49**, 10217–10219 (2010).
50. M. Xue, *et al.*, Selective gas adsorption within a five-connected porous metal-organic framework. *J. Mater. Chem.* **20**, 3984–3988 (2010).
51. Q. Yue, L. Yan, J. Y. Zhang, E. Q. Gao, Novel functionalized metal-organic framework based on unique hexagonal prismatic clusters. *Inorg. Chem.* **49**, 8647–8649 (2010).
52. X. Y. Huang, *et al.*, Three-dimensional fivefold interpenetrating microporous metal-organic framework based on mixed flexible ligands. *Inorg. Chem. Commun.* **13**, 338–341 (2010).
53. A. J. Blake, *et al.*, Photoreactivity examined through incorporation in metal-organic frameworks. *Nat. Chem.* **2**, 688–694 (2010).
54. Q. Yu, *et al.*, Three-dimensional porous metal-organic frameworks exhibiting metamagnetic behaviors: Synthesis, structure, adsorption, and magnetic properties. *Inorg. Chem.* **49**, 4301–4306 (2010).
55. R. Zou, *et al.*, A porous metal-organic replica of  $\alpha$ -PbO<sub>2</sub> for capture of nerve agent surrogate. *J. Am. Chem. Soc.* **132**, 17996–17999 (2010).
56. D. Liu, Z. Xie, L. Ma, W. Lin, Three-dimensional metal-organic frameworks based on tetrahedral and square-planar building blocks: Hydrogen sorption and dye uptake studies. *Inorg. Chem.* **49**, 9107–9109 (2010).
57. D. Banerjee, *et al.*, Synthesis and structural characterization of a 3-D lithium based metal-organic framework showing dynamic structural behavior. *Cryst. Growth Des.* **10**, 2801–2805 (2010).
58. B. W. Hu, *et al.*, A new azido-nickel compound with three-dimensional Kagomé topology. *Cryst. Growth Des.* **10**, 2829–2831 (2010).
59. F. Chen, *et al.*, Crystal structure and magnetic property of a 3D heterometallic coordination polymer constructed by 3-cyanobenzoate and 3-(5H-tetrazol) benzoate ligands. *Inorg. Chem. Commun.* **13**, 278–281 (2010).
60. Z. Hassanzadeh Fard, M. Hołyńska, S. Dehnen, Organotin chalcogenide salts: Synthesis, characterization, and extended crystal structures. *Inorg. Chem.* **49**, 5748–5752 (2010).
61. P. Thuéry, B. Masci, Two-and three-dimensional europium-organic assemblies with the all-cis and all-trans isomers of 1,2,3,4,5,6-cyclohexanehexacarboxylic acid. *Cryst. Growth Des.* **10**, 3626–3631 (2010).
62. J. Zhang, *et al.*, Porous coordination polymers of transition metal sulfides with PtS topology built on a semirigid tetrahedral linker. *Inorg. Chem.* **49**, 7685–7691 (2010).
63. A. E. Platero-Prats, V. A. De La Peña-O'shea, N. Snejko, Á. Monge, E. Gutiérrez-

- Puebla, Dynamic calcium metal-organic framework acts as a selective organic solvent sponge. *Chem. - A Eur. J.* **16**, 11632–11640 (2010).
64. B. F. Abrahams, M. J. Grannas, T. A. Hudson, R. Robson, A simple lithium(I) salt with a microporous structure and its gas sorption properties. *Angew. Chemie - Int. Ed.* **49**, 1087–1089 (2010).
  65. J. Jia, *et al.*, Coordination polymers of biphenyl-2,4,2',4'-tetracarboxylic acid - Synthesis, structures and adsorption properties. *CrystEngComm* **12**, 1548–1561 (2010).
  66. B. Li, *et al.*, Coordination polymers constructed by 1,3-bi(4-pyridyl)propane with four different conformations and 2,2'-dinitro-4,4'-biphenyldicarboxylate ligands: The effects of metal ions. *CrystEngComm* **13**, 1291–1298 (2011).
  67. G. Jiang, *et al.*, A nine-connected mixed-ligand nickel-organic framework and its gas sorption properties. *Cryst. Growth Des.* **11**, 3713–3716 (2011).
  68. M. Meng, D. C. Zhong, T. B. Lu, Three porous metal-organic frameworks based on an azobenzenetricarboxylate ligand: Synthesis, structures, and magnetic properties. *CrystEngComm* **13**, 6794–6800 (2011).
  69. T. Yamada, *et al.*, Porous interpenetrating metal-organic frameworks with hierarchical nodes. *Cryst. Growth Des.* **11**, 1798–1806 (2011).
  70. J. Lhoste, N. Henry, P. Roussel, T. Loiseau, F. Abraham, An uranyl citrate coordination polymer with a 3D open-framework involving uranyl cation-cation interactions. *Dalt. Trans.* **40**, 2422–2424 (2011).
  71. P. Kanoo, A. C. Ghosh, T. K. Maji, A vanadium (VO<sup>2+</sup>) metal-Organic framework: Selective vapor adsorption, magnetic properties, and use as a precursor for a polyoxovanadate. *Inorg. Chem.* **50**, 5145–5152 (2011).
  72. Z. B. Han, *et al.*, Mn(II)-based porous metal-organic framework showing metamagnetic properties and high hydrogen adsorption at low pressure. *Inorg. Chem.* **51**, 674–679 (2012).
  73. H. Wu, J. F. Ma, Y. Y. Liu, J. Yang, H. Y. Liu, Diverse topologies of six coordination polymers constructed from a tris(4-imidazolylphenyl)amine ligand and different carboxylates. *CrystEngComm* **13**, 7121–7128 (2011).
  74. L. M. Zhao, *et al.*, Metal-organic frameworks based on transition-metal carboxylate clusters as secondary building units: Synthesis, structures and properties. *CrystEngComm* **13**, 907–913 (2011).
  75. A. Ikobayashi, *et al.*, Ln-Co-based rock-salt-type porous coordination polymers: Vapor response controlled by changing the lanthanide ion. *Inorg. Chem.* **50**, 2061–2063 (2011).
  76. S. Pérez-Yáñez, *et al.*, Open-framework copper adeninate compounds with three-dimensional microchannels tailored by aliphatic monocarboxylic acids. *Inorg. Chem.* **50**, 5330–5332 (2011).
  77. C. Volkringer, *et al.*, Metal-organic-framework-type 1D-channel open network of a tetravalent uranium trimesate. *Inorg. Chem.* **50**, 11865–11867 (2011).
  78. F. Wang, *et al.*, Six new metal-organic frameworks with multi-carboxylic acids and imidazole-based spacers: Syntheses, structures and properties. *Dalt. Trans.* **40**, 11856–11865 (2011).
  79. B. Li, *et al.*, Construction of coordination polymers based on bent 4-amino-3,5-bis(3-carboxyphenyl)-1,2,4-triazole ligand: Diverse structural topology and



- photoluminescent and magnetic properties. *Cryst. Growth Des.* **11**, 1475–1485 (2011).
80. A. N. Alsobrook, *et al.*, From layered structures to cubic frameworks: Expanding the structural diversity of uranyl carboxyphosphonates via the incorporation of cobalt. *Cryst. Growth Des.* **11**, 1385–1393 (2011).
  81. P. O. Adelani, T. E. Albrecht-Schmitt, Pillared and open-framework uranyl diphosphonates. *J. Solid State Chem.* **184**, 2368–2373 (2011).
  82. G. Ren, *et al.*, A 9-connected metal-organic framework with gas adsorption properties. *J. Mater. Chem.* **21**, 15909–15913 (2011).
  83. M. Oh, M. S. Lah, Adsorbate selectivity of isoreticular microporous metal-organic frameworks with similar static pore dimensions. *Cryst. Growth Des.* **11**, 5064–5071 (2011).
  84. Y. Yan, *et al.*, Modifying cage structures in metal-organic polyhedral frameworks for H<sub>2</sub> storage. *Chem. - A Eur. J.* **17**, 11162–11170 (2011).
  85. Y. N. Gong, *et al.*, Counter-cation modulation of hydrogen and methane storage in a sodalite-type porous metal-organic framework. *Chem. Commun.* **48**, 12002–12004 (2012).
  86. P. O. Adelani, T. E. Albrecht-Schmitt, Heterobimetallic copper(II) uranyl carboxyphenylphosphonates. *Cryst. Growth Des.* **11**, 4676–4683 (2011).
  87. P. Zhang, B. Li, Y. Zhao, X. Meng, T. Zhang, A novel (3,36)-connected and self-interpenetrated metal-organic framework with high thermal stability and gas-adsorption capabilities. *Chem. Commun.* **47**, 7722–7724 (2011).
  88. S. S. Chen, *et al.*, Entangled coordination frameworks with 1,4-Di(1 H-imidazol-4-yl)benzene. *Cryst. Growth Des.* **11**, 1082–1090 (2011).
  89. X. Zhao, *et al.*, A zeolitic porous lithium-organic framework constructed from cubane clusters. *Chem. Commun.* **47**, 5536–5538 (2011).
  90. R. Ma, C. Chen, B. Sun, X. Zhao, N. Zhang, A new 3D metal-organic framework with (4, 8)-connected A<sub>1</sub>B<sub>2</sub> topology constructed from coordinated evolution of a C<sub>3</sub> symmetry ligand. *Inorg. Chem. Commun.* **14**, 1532–1536 (2011).
  91. S. Su, *et al.*, An active-site-accessible porous metal-organic framework composed of triangular building units: Preparation, catalytic activity and magnetic property. *Chem. Commun.* **48**, 11118–11120 (2012).
  92. R. Sen, D. Saha, S. Koner, Controlled construction of metal-organic frameworks: Hydrothermal synthesis, X-ray structure, and heterogeneous catalytic study. *Chem. - A Eur. J.* **18**, 5979–5986 (2012).
  93. Y. Zhang, Q. Wang, Y. J. Xiao, J. Han, X. L. Zhao, Structure diversity of a series of new coordination polymers based on a C<sub>3</sub>-symmetric tridentate ligand with rosette architecture. *Polyhedron* **33**, 127–136 (2012).
  94. L. Sun, L. Ma, J. B. Cai, L. Liang, H. Deng, Novel tetrazole-based metal-organic frameworks constructed from in situ synthesized bifunctional ligands: Syntheses, structure and luminescent properties. *CrystEngComm* **14**, 890–898 (2012).
  95. Z. Lu, *et al.*, Water stable metal-organic framework evolutionally formed from a flexible multidentate ligand with acylamide groups for selective CO<sub>2</sub> adsorption. *Cryst. Growth Des.* **12**, 1081–1084 (2012).
  96. D. Lässig, J. Lincke, R. Gerhardt, H. Krautscheid, Solid-state syntheses of coordination polymers by thermal conversion of molecular building blocks and

- polymeric precursors. *Inorg. Chem.* **51**, 6180–6189 (2012).
97. X. Z. Song, C. Qin, W. Guan, S. Y. Song, H. J. Zhang, An unusual three-dimensional self-penetrating network derived from cross-linking of two-fold interpenetrating nets via ligand-unsupported Ag-Ag bonds: Synthesis, structure, luminescence, and theoretical study. *New J. Chem.* **36**, 877–882 (2012).
  98. M. Ahmad, R. Das, P. Lama, P. Poddar, P. K. Bharadwaj, Synthesis, characterization, and magnetic studies of coordination polymers with Co(II) and Mn(II) ions. *Cryst. Growth Des.* **12**, 4624–4632 (2012).
  99. T. Kundu, S. C. Sahoo, R. Banerjee, Variable water adsorption in amino acid derivative based homochiral metal organic frameworks. *Cryst. Growth Des.* **12**, 4633–4640 (2012).
  100. L. Wen, *et al.*, Assembly of two porous cadmium(II) frameworks: Selective adsorption and luminescent property. *Cryst. Growth Des.* **12**, 4083–4089 (2012).
  101. K. C. Stylianou, *et al.*, Dimensionality transformation through paddlewheel reconfiguration in a flexible and porous Zn-based metal-organic framework. *J. Am. Chem. Soc.* **134**, 20466–20478 (2012).
  102. Q. Chen, W. Xue, B. Y. Wang, M. H. Zeng, X. M. Chen, Unprecedented binodal (7,9)-connected network based on distinct tricobalt(II) clusters: Structure, topology and cooperative magnetism. *CrystEngComm* **14**, 2009–2014 (2012).
  103. C. Z. Ruan, *et al.*, Two triazole-based metal-organic frameworks constructed from nanosized Cu<sub>20</sub> and Cu<sub>30</sub> wheels. *Inorg. Chem.* **51**, 7587–7591 (2012).
  104. P. V. Dau, K. K. Tanabe, S. M. Cohen, Functional group effects on metal-organic framework topology. *Chem. Commun.* **48**, 9370–9372 (2012).
  105. A. Dauth, J. A. Love, Synthesis and reactivity of 2-azametallacyclobutanes. *Dalt. Trans.* **41**, 7782–7791 (2012).
  106. L. Wen, W. Shi, X. Chen, H. Li, P. Cheng, A porous metal-organic framework based on triazoledicarboxylate ligands - Synthesis, structure, and gas-sorption studies. *Eur. J. Inorg. Chem.*, 3562–3568 (2012).
  107. W. Y. Gao, *et al.*, A pillared metal-organic framework incorporated with 1,2,3-triazole moieties exhibiting remarkable enhancement of CO<sub>2</sub> uptake. *Chem. Commun.* **48**, 8898–8900 (2012).
  108. F. Yang, *et al.*, Two metal-organic frameworks constructed from one-dimensional cobalt(II) ferrimagnetic chains with alternating antiferromagnetic/ferromagnetic and AF/AF/FM interaction: Synthesis, structures, and magnetic properties. *Inorg. Chem.* **51**, 6813–6820 (2012).
  109. Q. R. Fang, D. Q. Yuan, J. Sculley, W. G. Lu, H. C. Zhou, A novel MOF with mesoporous cages for kinetic trapping of hydrogen. *Chem. Commun.* **48**, 254–256 (2012).
  110. J. An, *et al.*, Metal-adeninate vertices for the construction of an exceptionally porous metal-organic framework. *Nat. Commun.* **3**, 604 (2012).
  111. M. Majumder, *et al.*, Aqueous molecular sieving and strong gas adsorption in highly porous MOFs with a facile synthesis. *Chem. Mater.* **24**, 4647–4652 (2012).
  112. F. J. Muñoz-Lara, *et al.*, Fast detection of water and organic molecules by a change of color in an Iron(II) microporous spin-crossover coordination polymer. *Inorg. Chem.* **51**, 13078–13080 (2012).
  113. T. W. Tseng, *et al.*, Porous metal-organic frameworks with multiple cages based

- on tetrazolate ligands: Synthesis, structures, photoluminescence, and gas adsorption properties. *Cryst. Growth Des.* **13**, 510–517 (2013).
114. Z. Lin, *et al.*, Ultrasensitive sorption behavior of isostructural lanthanide-organic frameworks induced by lanthanide contraction. *J. Mater. Chem.* **22**, 21076–21084 (2012).
  115. E. Jeong, *et al.*, Reversible structural transformation and selective gas adsorption in a unique aqua-bridged Mn(II) metal-organic framework. *Chem. Commun.* **49**, 2329–2331 (2013).
  116. L. Wang, *et al.*, Reactant ratio-modulated entangled Cd(II) coordination polymers based on rigid tripodal imidazole ligand and tetrabromoterephthalic acid: Interpenetration, interdigitation and self-penetration. *CrystEngComm* **15**, 5552–5560 (2013).
  117. Z. Z. Wen, *et al.*, The construction of Cu(I)/Cu(II) coordination polymers based on pyrazine-carboxylate: Structural diversity tuned by in situ hydrolysis reaction. *CrystEngComm* **15**, 5359–5367 (2013).
  118. Y. Y. Huang, X. Zhang, Y. G. Yao, Employing heterometallic trinuclear cluster as building subunit to construct a new coordination polymer with rare 3D inorganic - Cd-O-Ba- connectivity. *Inorganica Chim. Acta* **397**, 38–41 (2013).
  119. L. Chen, *et al.*, Self-assembly of metal-organic frameworks based on N-donor ligand and flexible tricarboxylic acids with different angular characters. *CrystEngComm* **15**, 8214–8221 (2013).
  120. T. T. Lian, S. M. Chen, F. Wang, J. Zhang, Metal-organic framework architecture with polyhedron-in-polyhedron and further polyhedral assembly. *CrystEngComm* **15**, 1036–1038 (2013).
  121. C. P. Li, J. Chen, P. W. Liu, M. Du, Structural diversity and fluorescent properties of Cd<sup>II</sup> coordination polymers with 5-halonicotinate regulated by solvent and ligand halogen-substituting effect. *CrystEngComm* **15**, 9713–9721 (2013).
  122. C. Falaise, *et al.*, Three-dimensional MOF-type architectures with tetravalent uranium hexanuclear motifs (U<sub>6</sub>O<sub>8</sub>). *Chem. - A Eur. J.* **19**, 5324–5331 (2013).
  123. X. Z. Song, *et al.*, Two high-connected metal-organic frameworks based on d<sup>10</sup>-metal clusters: Syntheses, structural topologies and luminescent properties. *Dalt. Trans.* **42**, 8183–8187 (2013).
  124. H. X. Zhang, H. R. Fu, H. Y. Li, J. Zhang, X. Bu, Porous ctn-type boron imidazolate framework for gas storage and separation. *Chem. - A Eur. J.* **19**, 11527–11530 (2013).
  125. C. Zhan, C. Zou, G. Q. Kong, C. De Wu, Four honeycomb metal-organic frameworks with a flexible tripodal polyaromatic acid. *Cryst. Growth Des.* **13**, 1429–1437 (2013).
  126. C. R. Murdock, Z. Lu, D. M. Jenkins, Effects of solvation on the framework of a breathing copper MOF employing a semirigid linker. *Inorg. Chem.* **52**, 2182–2187 (2013).
  127. Y. Wu, X. P. Zhou, J. R. Yang, D. Li, Gyroidal metal-organic frameworks by solvothermal subcomponent self-assembly. *Chem. Commun.* **49**, 3413–3415 (2013).
  128. F. Xing, *et al.*, Synthesis, structure and adsorption of coordination polymers constructed from 3,3',5,5'-azobenzenetetracarboxylic acid and Zn ions.

- CrystEngComm* **15**, 4970–4980 (2013).
129. J. P. Zhao, *et al.*, Azido-directed formation of an unprecedented Mn(II)-organic framework with nanoscale cubic cage units. *Cryst. Growth Des.* **13**, 437–439 (2013).
  130. A. Ablet, *et al.*, Luminescence tuning and white-light emission of co-doped Ln-Cd-organic frameworks. *Chem. - An Asian J.* **8**, 95–100 (2013).
  131. J. H. Cavka, *et al.*, A new zirconium inorganic building brick forming metal organic frameworks with exceptional stability. *J. Am. Chem. Soc.* **130**, 13850–13851 (2008).
  132. K. S. Park, *et al.*, Exceptional chemical and thermal stability of zeolitic imidazolate frameworks. *Proc. Natl. Acad. Sci.* **103**, 10186–10191 (2006).
  133. S. S. Y. Chui, S. M. F. Lo, J. P. H. Charmant, A. G. Orpen, I. D. Williams, A chemically functionalizable nanoporous material  $[\text{Cu}_3(\text{TMA})_2(\text{H}_2\text{O})_3]_n$ . *Science* **283**, 1148–1150 (1999).
  134. C. Férey, *et al.*, Chemistry: A chromium terephthalate-based solid with unusually large pore volumes and surface area. *Science* **309**, 2040–2042 (2005).
  135. H. Li, M. Eddaoudi, M. O’Keeffe, O. M. Yaghi, Design and synthesis of an exceptionally stable and highly porous framework. *Nature* **402**, 276–279 (1999).
  136. H. K. Chae, *et al.*, A route to high surface area, porosity and inclusion of large molecules in crystals. *Nature* **427**, 523–527 (2004).
